# Supplementary material for: Biochar Acts as an Emerging Soil Amendment and Its Potential Ecological Risks: A Review
Source: MDPI journal article supplement (doi:10.3390/en16010410), 2022-12-29
Supplement: s1 [file s1]

# **Biochar acts as an emerging soil amendment and its potential ecological risks: A review**

Yue Zhao<sup>a</sup>, Xin Li<sup>a\*</sup>, Huanyu Bao<sup>a</sup>, Jia Xing<sup>c</sup>, Yongzhao Zhu<sup>d</sup>, Jun Nan<sup>a</sup>, Guoren Xu<sup>a,b</sup>

*a. School of Environment, Harbin Institute of Technology, Harbin, 150090, China*

*b. College of Resources and Environment, University of Chinese Academy of Sciences (UCAS), Beijing, 100049, China*

*c. Institute of Microbiology, Guangdong Academy of Sciences, Guangzhou, 510070, China*

*d. China Railway Siyuan Survey And Design Group Co., LTD., Wuhan, 430063, China*

*\*Corresponding author: Xin Li*

*E-mail address: [lixinwindows@163.com](mailto:lixinwindows@163.com) (Xin Li)*

**Table S1.** Differences in physical and chemical properties of different types of biochar.

| Feedstock       | Pyrolysis temperature (°C) | pH          | Ash (%) | Elements (%) |             |   |             |     |             |      | H/C  | O/C | Surface Area (m <sup>2</sup> g <sup>-1</sup> ) | EC (ds m <sup>-1</sup> ) | CEC (cmol kg <sup>-1</sup> ) | Reference |
|-----------------|----------------------------|-------------|---------|--------------|-------------|---|-------------|-----|-------------|------|------|-----|------------------------------------------------|--------------------------|------------------------------|-----------|
|                 |                            |             |         | C            | H           | O | N           | P   | S           | K    |      |     |                                                |                          |                              |           |
| Granular sludge | 300                        | 7.8 ± 0.1   | -       | 53.5 ± 0.2   | 5.8 ± 0.1   | - | 9.0         | 0.2 | -           | 0.06 | 0.11 | -   | -                                              | -                        | -                            | [1]       |
|                 |                            | 9.5 ± 0.1   | -       | 48.0 ± 0.2   | 1.8 ± 0.1   | - | 6.9         | 0.3 | -           | 0.09 | 0.04 | -   | -                                              | -                        | -                            |           |
|                 |                            | 9.7 ± 0.1   | -       | 50.5 ± 0.2   | 1.0 ± 0.1   | - | 6.5         | 0.6 | -           | 0.08 | 0.02 | -   | -                                              | -                        | -                            |           |
|                 | 550                        | 6.55 ± 0.05 | -       | 11.19 ± 0.07 | 1.83 ± 0.01 | - | 1.72 ± 0.05 | -   | 0.92 ± 0.05 | -    | 0.16 | -   | 36.8 ± 0.97                                    | -                        | -                            |           |
|                 |                            | 6.96 ± 0.05 | -       | 8.61 ± 0.05  | 1.22 ± 0.05 | - | 1.31 ± 0.05 | -   | 0.95 ± 0.05 | -    | 0.14 | -   | 51.5 ± 0.0                                     | -                        | -                            |           |
|                 |                            | 6.96 ± 0.05 | -       | 8.61 ± 0.05  | 1.22 ± 0.05 | - | 1.31 ± 0.05 | -   | 0.95 ± 0.05 | -    | 0.14 | -   | 51.5 ± 0.0                                     | -                        | -                            |           |
| Sewage sludge   | 300                        | 6.55 ± 0.05 | -       | 11.19 ± 0.07 | 1.83 ± 0.01 | - | 1.72 ± 0.05 | -   | 0.92 ± 0.05 | -    | 0.16 | -   | 36.8 ± 0.97                                    | -                        | -                            | [2]       |
|                 |                            | 6.96 ± 0.05 | -       | 8.61 ± 0.05  | 1.22 ± 0.05 | - | 1.31 ± 0.05 | -   | 0.95 ± 0.05 | -    | 0.14 | -   | 51.5 ± 0.0                                     | -                        | -                            |           |
|                 |                            | 6.96 ± 0.05 | -       | 8.61 ± 0.05  | 1.22 ± 0.05 | - | 1.31 ± 0.05 | -   | 0.95 ± 0.05 | -    | 0.14 | -   | 51.5 ± 0.0                                     | -                        | -                            |           |

|        |     |       |     |        |       |   |       |       |       |       |       |   |       |       |       |     |
|--------|-----|-------|-----|--------|-------|---|-------|-------|-------|-------|-------|---|-------|-------|-------|-----|
|        |     | 0.04  |     |        | 0.07  |   | 0.02  |       | 0.09  |       |       |   | 1.06  |       |       |     |
|        | 500 | 7.57  | -   | 8.35 ± | 0.85  | - | 1.18  | -     | 0.98  | -     | 0.10  | - | 57.5  | -     | -     |     |
|        |     | ±     |     | 0.06   | ±     |   | ±     |       | ±     |       |       |   | 6 ±   |       |       |     |
|        |     | 0.10  |     |        | 0.04  |   | 0.02  |       | 0.09  |       |       |   | 0.81  |       |       |     |
|        | 600 | 7.96  | -   | 8.15 ± | 0.59  | - | 0.94  | -     | 0.95  | -     | 0.07  | - | 54.5  | -     | -     |     |
|        |     | ±     |     | 0.06   | ±     |   | ±     |       | ±     |       |       |   | 2 ±   |       |       |     |
|        |     | 0.07  |     |        | 0.04  |   | 0.02  |       | 0.06  |       |       |   | 0.61  |       |       |     |
|        | 700 | 8.51  | -   | 7.68 ± | 0.41  | - | 0.66  | -     | 0.94  | -     | 0.05  | - | 50.2  | -     | -     |     |
|        |     | ±     |     | 0.12   | ±     |   | ±     |       | ±     |       |       |   | 7 ±   |       |       |     |
|        |     | 0.12  |     |        | 0.04  |   | 0.33  |       | 0.08  |       |       |   | 0.58  |       |       |     |
| Sewage | 450 | 6.5 ± | 62. | 21.2 ± | -     | - | 1.8 ± | 4.2 ± | 1.0 ± | 0.31  | -     | - | -     | 3.4 ± | 18.9  | [3] |
| sludge |     | 0.3   | 2 ± | 0.10   |       |   | 0.2   | 0.3   | 0.1   | ± 0.1 |       |   |       | 0.3   | ± 2.5 |     |
|        |     |       | 0.7 |        |       |   |       |       |       |       |       |   |       |       |       |     |
|        |     |       | 5   |        |       |   |       |       |       |       |       |   |       |       |       |     |
| Sewage | 300 | 5.8 ± | -   | 23.4 ± | 3.6 ± | - | 3.3 ± | 4.1   | 1.5   | 0.1   | 1.8 ± | - | 20.2  | -     | -     | [4] |
| sludge |     | 0.2   |     | 0.4    | 0.1   |   | 0.1   |       |       |       | 0.1   |   | ± 1.8 |       |       |     |
|        | 500 | 6.5 ± | -   | 19.0 ± | 1.7 ± | - | 2.3 ± | 6.1   | 0.7   | 0.1   | 1.1 ± | - | 52.5  | -     | -     |     |

|           |     |      |     |        |      |      |      |      |      |      |      |      |       |      |       |                     |
|-----------|-----|------|-----|--------|------|------|------|------|------|------|------|------|-------|------|-------|---------------------|
|           |     | 0.3  |     | 0.2    | 0.1  |      | 0.1  |      |      |      | 0.1  |      | ± 4.3 |      |       |                     |
| Brewery   | 500 | 9.18 | 79. | 14.76  | 0.61 | 82.2 | 2.14 | 0.85 | 0.28 | 0.59 | 0.49 | 5.57 | -     | 0.60 | 46.62 | <a href="#">[5]</a> |
| wastewat  |     |      | 89  |        |      | 1    |      |      |      |      |      |      |       |      |       |                     |
| er sludge |     |      |     |        |      |      |      |      |      |      |      |      |       |      |       |                     |
| Sewage    | 500 | 7.28 | 34. | 43.0 ± | 3.20 | -    | 6.80 | 1.06 | -    | -    | 0.07 | -    | 77.2  | 10.4 | 22.2  | <a href="#">[6]</a> |
| sludge    |     | ±    | 1 ± | 0.05   | ±    |      | ±    | ±    |      |      |      |      | ±     | ±    | ±     |                     |
|           |     | 0.05 | 0.0 |        | 0.02 |      | 0.01 | 0.05 |      |      |      |      | 0.75  | 0.05 | 0.11  |                     |
|           |     |      | 5   |        |      |      |      |      |      |      |      |      |       |      |       |                     |
| Sewage    | 200 | 6.54 | 68. | 17.09  | 2.09 | 10.0 | 2.19 | 0.04 | -    | 0.76 | 0.12 | 0.59 | -     | 0.35 | -     | <a href="#">[7]</a> |
| sludge    |     |      | 62  |        |      | 1    |      |      |      |      |      |      |       |      |       |                     |
|           | 300 | 7.20 | 70. | 19.72  | 1.79 | 5.76 | 2.59 | 0.02 | -    | 1.0  | 0.09 | 0.29 | -     | 0.11 | -     |                     |
|           |     |      | 14  |        |      |      |      |      |      |      |      |      |       |      |       |                     |
|           | 500 | 8.70 | 79. | 15.26  | 0.73 | 3.28 | 1.73 | 0.02 | -    | 1.3  | 0.05 | 0.21 | -     | 0.07 | -     |                     |
|           |     |      | 00  |        |      |      |      |      |      |      |      |      |       |      |       |                     |
|           | 700 | 11.1 | 85. | 11.33  | 0.31 | 1.90 | 0.71 | 0.01 | -    | 1.3  | 0.03 | 0.17 | -     | 0.10 | -     |                     |
|           |     | 5    | 75  |        |      |      |      |      |      |      |      |      |       |      |       |                     |
| Sewage    | 550 | 8.2  | -   | -      | -    | -    | 0.23 | 0.01 | -    | -    | -    | -    | -     | 1.9  | -     | <a href="#">[8]</a> |

sludge

|      |     |      |     |       |      |      |      |   |   |   |      |      |      |   |       |     |
|------|-----|------|-----|-------|------|------|------|---|---|---|------|------|------|---|-------|-----|
| Rice | 400 | 7.87 | 2.3 | 51.41 | 2.75 | 20.4 | 1.45 | - | - | - | 0.64 | 0.30 | 1.35 | - | 11.09 | [9] |
|------|-----|------|-----|-------|------|------|------|---|---|---|------|------|------|---|-------|-----|

|       |     |      |     |       |      |      |      |   |   |   |      |      |      |   |      |  |
|-------|-----|------|-----|-------|------|------|------|---|---|---|------|------|------|---|------|--|
| straw |     |      | 89  |       |      | 9    |      |   |   |   |      |      |      |   |      |  |
|       | 700 | 10.7 | 3.2 | 55.85 | 2.08 | 9.47 | 1.30 | - | - | - | 0.45 | 0.13 | 9.72 | - | 9.70 |  |
|       |     | 3    | 69  |       |      |      |      |   |   |   |      |      |      |   |      |  |

|      |     |      |     |       |      |      |      |   |   |   |      |      |      |   |      |  |
|------|-----|------|-----|-------|------|------|------|---|---|---|------|------|------|---|------|--|
| Rice | 400 | 7.72 | 2.8 | 47.45 | 0.68 | 21.4 | 0.80 | - | - | - | 0.17 | 0.34 | 1.39 | - | 9.58 |  |
|------|-----|------|-----|-------|------|------|------|---|---|---|------|------|------|---|------|--|

|      |     |      |     |       |      |      |      |   |   |   |      |      |      |   |      |  |
|------|-----|------|-----|-------|------|------|------|---|---|---|------|------|------|---|------|--|
| husk |     |      | 23  |       |      | 3    |      |   |   |   |      |      |      |   |      |  |
|      | 700 | 10.3 | 4.0 | 50.22 | 1.14 | 7.35 | 1.07 | - | - | - | 0.27 | 0.11 | 10.0 | - | 6.40 |  |
|      |     | 9    | 22  |       |      |      |      |   |   |   |      |      | 2    |   |      |  |

|      |     |      |   |       |      |      |      |      |      |      |      |      |      |   |   |      |
|------|-----|------|---|-------|------|------|------|------|------|------|------|------|------|---|---|------|
| Rice | 250 | 7.64 | - | 45.07 | 4.62 | 19.2 | 0.86 | 1.16 | 0.28 | 1.88 | 1.23 | 0.32 | 1.13 | - | - | [10] |
|------|-----|------|---|-------|------|------|------|------|------|------|------|------|------|---|---|------|

|       |     |      |   |       |      |      |      |      |      |      |      |      |      |   |   |  |
|-------|-----|------|---|-------|------|------|------|------|------|------|------|------|------|---|---|--|
| straw |     |      |   |       |      | 3    |      |      |      |      |      |      | 5    |   |   |  |
|       | 350 | 9.94 | - | 48.71 | 3.55 | 18.8 | 0.91 | 1.62 | 0.26 | 3.61 | 0.87 | 0.29 | 2.90 | - | - |  |
|       |     |      |   |       |      | 3    |      |      |      |      |      |      | 0    |   |   |  |
|       | 450 | 10.6 | - | 50.44 | 2.75 | 18.8 | 0.83 | 2.01 | 0.27 | 3.88 | 0.65 | 0.28 | 7.65 | - | - |  |
|       |     | 3    |   |       |      | 3    |      |      |      |      |      |      | 8    |   |   |  |
|       | 550 | 11.1 | - | 48.53 | 2.08 | 18.7 | 0.77 | 2.57 | 0.24 | 4.06 | 0.51 | 0.29 | 13.2 | - | - |  |
|       |     | 1    |   |       |      | 6    |      |      |      |      |      |      | 73   |   |   |  |

|        |     |      |   |        |      |      |      |      |      |       |      |      |      |      |   |                      |
|--------|-----|------|---|--------|------|------|------|------|------|-------|------|------|------|------|---|----------------------|
|        | 650 | 11.1 | - | 39.75  | 1.73 | 19.6 | 0.71 | 3.94 | 0.36 | 5.42  | 0.52 | 0.37 | 14.3 | -    | - |                      |
|        |     | 5    |   |        | 3    | 1    |      |      |      |       |      |      | 26   |      |   |                      |
| Canola | 250 | 7.19 | - | 46.19  | 4.98 | 45.5 | 1.07 | 1.90 | 0.68 | 1.40  | 1.29 | 0.74 | 0.66 | -    | - |                      |
| stalk  |     |      |   |        |      | 7    |      |      |      |       |      |      | 4    |      |   |                      |
|        | 350 | 10.5 | - | 56.21  | 3.42 | 47.2 | 1.01 | 2.60 | 0.93 | 25.35 | 0.73 | 0.63 | 1.15 | -    | - |                      |
|        |     | 8    |   |        |      | 2    |      |      |      |       |      |      | 1    |      |   |                      |
|        | 450 | 10.6 | - | 61.87  | 3.02 | 47.8 | 1.01 | 2.95 | 1.06 | 25.74 | 0.59 | 0.58 | 2.50 | -    | - |                      |
|        |     | 3    |   |        |      | 5    |      |      |      |       |      |      | 2    |      |   |                      |
|        | 550 | 10.7 | - | 60.26  | 2.23 | 49.8 | 0.89 | 3.11 | 1.20 | 25.68 | 0.44 | 0.62 | 4.37 | -    | - |                      |
|        |     | 6    |   |        |      | 1    |      |      |      |       |      |      | 5    |      |   |                      |
|        | 650 | 10.9 | - | 41.66  | 1.86 | 49.4 | 1.02 | 5.06 | 1.96 | 42.47 | 0.54 | 0.89 | 7.93 | -    | - |                      |
|        |     | 6    |   |        |      | 4    |      |      |      |       |      |      | 7    |      |   |                      |
| Wheat  | -   | 10.0 | - | 66.15  | 2.72 | -    | 0.88 | 0.14 | 0.04 | 3.02  | 0.04 | -    | 64.1 | 1.68 | - | <a href="#">[11]</a> |
| straw  |     | 2 ±  |   | ±      | ±    |      | ±    | ±    | ±    | ±     |      |      | 5    | ±    |   |                      |
|        |     | 0.01 |   | 0.80   | 0.05 |      | 0.02 | 0.01 | 0.01 | 0.07  |      |      |      | 0.10 |   |                      |
| Maize  | -   | 9.99 | - | 53.50  | 2.66 | -    | 2.17 | 0.72 | 0.08 | 2.29  | 0.05 | -    | 76.3 | 1.66 | - |                      |
| straw  |     | ±    |   | ± 0.11 | ±    |      | ±    | ±    | ±    | ±     |      |      | 3    | ±    |   |                      |

|         |     |      |     |        |      |      |      |      |      |      |      |      |      |      |      |      |
|---------|-----|------|-----|--------|------|------|------|------|------|------|------|------|------|------|------|------|
|         |     | 0.01 |     |        | 0.02 |      | 0.00 | 0.06 | 0.04 | 0.18 |      |      |      | 0.01 |      |      |
| Orange  | 500 | 10.0 | 16. | 72.3 ± | 1.83 | -    | 2.55 | 0.52 | -    | -    | 0.03 | -    | 99.2 | 3.75 | 63.5 | [6]  |
| bagasse |     | ±    | 1 ± | 0.28   | ±    |      | ±    | ±    |      |      |      |      | ±    | ±    | ±    |      |
|         |     | 0.05 | 0.0 |        | 0.01 |      | 0.02 | 0.01 |      |      |      |      | 0.45 | 0.02 | 0.17 |      |
|         |     |      | 5   |        |      |      |      |      |      |      |      |      |      |      |      |      |
| Coconut | 500 | 10.5 | 10. | 79.5 ± | 2.21 | -    | 0.42 | 0.02 | -    | -    | 0.03 | -    | 122  | 4.20 | 69.7 |      |
| shell   |     | ±    | 8 ± | 0.06   | ±    |      | ±    | ±    |      |      |      |      | ±    | ±    | ±    |      |
|         |     | 0.06 | 0.0 |        | 0.01 |      | 0.01 | 0.05 |      |      |      |      | 0.05 | 0.05 | 0.17 |      |
|         |     |      | 5   |        |      |      |      |      |      |      |      |      |      |      |      |      |
| Oilseed | 550 | 9.78 | 19. | 68.85  | 1.82 | 8.91 | 1.29 | 0.29 | -    | 2.86 | 0.32 | 0.10 | 7.30 | 2.27 | -    | [12] |
| rape    |     | ±    | 50  | ± 2.26 | ±    | ±    | ±    | ±    |      | ±    | ±    | ±    |      | ±    |      |      |
| straw   |     | 0.47 | ±   |        | 0.22 | 1.30 | 0.22 | 0.08 |      | 0.26 | 0.03 | 0.02 |      | 0.38 |      |      |
|         |     |      | 2.1 |        |      |      |      |      |      |      |      |      |      |      |      |      |
|         |     |      | 6   |        |      |      |      |      |      |      |      |      |      |      |      |      |
|         | 700 | 10.4 | 21. | 67.74  | 1.09 | 7.84 | 1.26 | 0.26 | -    | 2.98 | 0.19 | 0.09 | 25.2 | 3.11 | -    |      |
|         |     | 1 ±  | 92  | ± 0.86 | ±    | ±    | ±    | ±    |      | ±    | ±    | ±    | 0    | ±    |      |      |
|         |     | 0.49 | ±   |        | 0.14 | 1.23 | 0.18 | 0.08 |      | 0.40 | 0.02 | 0.02 |      | 0.37 |      |      |

|                  |     | 0.5  |     |        |      |      |      |      |      |      |      |      |      |      |       |                      |  |
|------------------|-----|------|-----|--------|------|------|------|------|------|------|------|------|------|------|-------|----------------------|--|
|                  |     | 2    |     |        |      |      |      |      |      |      |      |      |      |      |       |                      |  |
| Softwood pellets | 550 | 7.91 | 1.2 | 85.52  | 2.77 | 10.3 | <    | 0.06 | -    | 0.25 | 0.39 | 0.09 | 26.4 | 0.09 | -     |                      |  |
|                  |     | ±    | 5 ± | ± 1.22 | ±    | 6 ±  | 0.10 | ±    |      | ±    | ±    | ±    | 0    | ±    |       |                      |  |
|                  |     | 0.30 | 0.4 |        | 0.09 | 1.19 |      | 0.04 |      | 0.07 | 0.01 | 0.01 |      | 0.03 |       |                      |  |
|                  |     | 2    |     |        |      |      |      |      |      |      |      |      |      |      |       |                      |  |
|                  | 700 | 8.44 | 1.8 | 90.21  | 1.83 | 6.02 | <    | 0.07 | -    | 0.28 | 0.24 | 0.05 | 162. | 0.16 | -     |                      |  |
|                  |     | ±    | 9 ± | ± 0.39 | ±    | ±    | 0.10 | ±    |      | ±    | ±    | ±    | 30   | ±    |       |                      |  |
|                  |     | 0.69 | 0.4 |        | 0.15 | 0.74 |      | 0.04 |      | 0.09 | 0.02 | 0.01 |      | 0.06 |       |                      |  |
|                  |     | 3    |     |        |      |      |      |      |      |      |      |      |      |      |       |                      |  |
| Wheat straw      | 300 | 6.6  | 22. | 47.73  | 2.21 | -    | 0.68 | 0.11 | -    | 4.06 | 0.56 | -    | 18.7 | -    | 128.7 | <a href="#">[13]</a> |  |
|                  |     | 6    |     |        |      |      |      |      |      |      |      |      |      |      |       |                      |  |
|                  |     | 2    |     |        |      |      |      |      |      |      |      |      |      |      |       |                      |  |
| Cow manure       | 300 | 8.48 | 42. | 34.29  | 3.31 | -    | 2.55 | -    | 0.17 | -    | 1.16 | -    | 3.52 | -    | -     | <a href="#">[14]</a> |  |
|                  |     | ±    | 71  | ± 0.89 | ±    |      | ±    |      | 6 ±  |      |      |      |      |      |       |                      |  |
|                  |     | 0.02 | ±   |        | 0.16 |      | 0.07 |      | 0.01 |      |      |      |      |      |       |                      |  |
|                  |     | 0.3  |     |        |      |      |      |      |      |      |      |      |      |      |       |                      |  |
|                  |     | 6    |     |        |      |      |      |      |      |      |      |      |      |      |       |                      |  |
|                  |     | 2    |     |        |      |      |      |      |      |      |      |      |      |      |       |                      |  |



|     |                   |                            |                 |                   |   |                   |   |                     |   |           |   |           |   |
|-----|-------------------|----------------------------|-----------------|-------------------|---|-------------------|---|---------------------|---|-----------|---|-----------|---|
| 400 | 9.18<br>±<br>0.01 | 45.<br>03<br>±<br>0.2<br>1 | 36.90<br>± 0.34 | 2.67<br>±<br>0.04 | - | 2.62<br>±<br>0.06 | - | 0.15<br>9 ±<br>0.00 | - | 0.87<br>6 | - | 5.01<br>- | - |
| 500 | 9.36<br>±<br>0.01 | 47.<br>99<br>±<br>0.1<br>9 | 37.51<br>± 0.21 | 1.99<br>±<br>0.04 | - | 2.53<br>±<br>0.08 | - | 0.15<br>9 ±<br>0.00 | - | 0.64<br>6 | - | 7.04<br>- | - |
| 600 | 9.60<br>±<br>0.01 | 51.<br>73<br>±<br>0.0<br>1 | 38.47<br>± 0.40 | 1.49<br>±<br>0.02 | - | 2.15<br>±<br>0.01 | - | 0.23<br>5 ±<br>0.00 | - | 0.46<br>3 | - | 13.9<br>- | - |

|                 |     |                                 |                                  |                         |                   |                     |                   |               |                  |            |                   |                   |              |                   |           |      |
|-----------------|-----|---------------------------------|----------------------------------|-------------------------|-------------------|---------------------|-------------------|---------------|------------------|------------|-------------------|-------------------|--------------|-------------------|-----------|------|
|                 | 700 | 10.3<br>6 ±<br>0.02<br>0.4<br>3 | 54.<br>49 ±<br>0.01<br>0.42<br>3 | 36.97<br>± 0.42<br>0.01 | 1.09<br>±<br>0.01 | -<br><br>0.04       | 1.45<br>±<br>0.04 | -<br><br>0.01 | 0.28<br><br>0.01 | -<br><br>3 | 0.35<br><br>      | -<br><br>         | 121.<br>10   | -<br><br>         | -<br><br> |      |
| Swine<br>manure | 300 | 9.01<br>±<br>0.04<br>0.5<br>6   | 50.<br>56 ±<br>0.5<br>6          | 32.58<br>± 0.51<br>0.6  | 3.60<br>±<br>0.08 | 11.5<br>1 ±<br>0.35 | 2.80<br>±<br>0.06 | -<br><br>     | -<br><br>        | -<br><br>  | 1.33<br>±<br>0.01 | 0.26<br>±<br>0.01 | 2.33<br><br> | 1.12<br>±<br>0.03 | -<br><br> | [15] |
|                 | 400 | 9.30<br>±<br>0.07<br>0.7<br>2   | 58.<br>49 ±<br>0.7<br>2          | 30.15<br>± 0.38<br>2    | 2.38<br>±<br>0.09 | 6.21<br>±<br>0.08   | 2.61<br>±<br>0.05 | -<br><br>     | -<br><br>        | -<br><br>  | 0.95<br>±<br>0.01 | 0.16<br>±<br>0.00 | 3.84<br><br> | 1.24<br>±<br>0.01 | -<br><br> |      |

|                 |     |                               |                        |                    |                   |                     |                        |   |   |   |                   |                   |                   |                          |   |      |
|-----------------|-----|-------------------------------|------------------------|--------------------|-------------------|---------------------|------------------------|---|---|---|-------------------|-------------------|-------------------|--------------------------|---|------|
|                 | 500 | 9.88<br>±<br>0.08<br>0.3<br>4 | 66.<br>88<br>±<br>0.30 | 28.23<br>±<br>0.05 | 1.58<br>±<br>0.27 | 3.46<br>±<br>0.06   | 2.21<br>±              | - | - | - | 0.67<br>±<br>0.00 | 0.09<br>±<br>0.00 | 11.3<br>4         | 1.41<br>±<br>0.03        | - |      |
| Swine<br>manure | 300 | 9.60<br>±<br>0.05<br>0.1<br>3 | 50.<br>60<br>±<br>0.10 | 34.87<br>±<br>0.02 | 3.66<br>±<br>0.18 | 33.6<br>8 ±<br>0.02 | 2.89<br>±              | - | - | - | 1.26              | 0.72              | 1.58<br>±<br>0.03 | 0.86<br>1 ±<br>0.01<br>9 | - | [16] |
|                 | 500 | 9.99<br>±<br>0.01<br>0.2<br>0 | 66.<br>52<br>±<br>0.09 | 31.59<br>±<br>0.01 | 1.43<br>±<br>0.01 | 26.4<br>8 ±<br>0.0  | 1.45<br>±<br>0.01<br>9 | - | - | - | 0.54              | 0.63              | 7.09<br>±<br>0.07 | 1.77<br>2 ±<br>0.01<br>4 | - |      |

|         |     |      |     |        |      |      |      |      |      |      |      |      |      |      |   |                      |
|---------|-----|------|-----|--------|------|------|------|------|------|------|------|------|------|------|---|----------------------|
|         | 700 | 10.2 | 68. | 30.87  | 0.68 | 19.9 | 0.94 | -    | -    | -    | 0.26 | 0.48 | 24.1 | 2.11 | - |                      |
|         |     | 6 ±  | 33  | ± 0.05 | ±    | 3 ±  | ±    |      |      |      |      |      | 4 ±  | 0 ±  |   |                      |
|         |     | 0.06 | ±   |        | 0.00 | 0.10 | 0.00 |      |      |      |      |      | 0.16 | 0.01 |   |                      |
|         |     |      | 0.2 |        |      |      |      |      |      |      |      |      |      | 6    |   |                      |
|         |     |      | 3   |        |      |      |      |      |      |      |      |      |      |      |   |                      |
| Chicken | 300 | 7.76 | -   | 39.23  | -    | -    | 5.78 | 2.36 | 0.28 | 2.92 | -    | -    | 102. | 4.00 | - | <a href="#">[17]</a> |
| manure  |     |      |     |        |      |      |      |      | 7    |      |      |      | 73   |      |   |                      |
| Horse   | 300 | 8.71 | -   | 60.45  | -    | -    | 2.41 | 1.67 | 0.12 | 1.45 | -    | -    | 102. | 0.31 | - |                      |
| manure  |     |      |     |        |      |      |      |      | 4    |      |      |      | 86   |      |   |                      |
| Goat    | 300 | 7.24 | -   | 57.18  | -    | -    | 0.25 | 1.57 | 2.58 | 0.55 | -    | -    | 98.8 | 1.56 | - |                      |
| manure  |     |      |     |        |      |      | 8    |      |      |      |      |      | 0    |      |   |                      |
| Camel   | 300 | 8.51 | -   | 54.33  | -    | -    | 1.94 | 0.82 | 0.15 | 0.50 | -    | -    | 103. | 0.32 | - |                      |
| manure  |     |      |     |        |      |      |      |      | 3    |      |      |      | 81   |      |   |                      |
| Sheep   | 300 | 8.73 | -   | 57.55  | -    | -    | 2.27 | 0.77 | 0.19 | 0.34 | -    | -    | 96.2 | 0.19 | - |                      |
| manure  |     |      |     |        |      |      |      |      | 0    |      |      |      | 9    |      |   |                      |
| Rabbit  | 300 | 8.24 | -   | 56.75  | -    | -    | 2.43 | 0.37 | 0.17 | 0.29 | -    | -    | 105. | 0.27 | - |                      |
| manure  |     |      |     |        |      |      |      |      | 2    |      |      |      | 61   |      |   |                      |

[illegible]

## References

- [1] Kim, H.B.; Kim, S.H.; Jeon, E.K.; Kim, D.H.; Tsang, DCW.; Alessi, D.S.; Kwon, E.E.; Baek, K. Effect of dissolved organic carbon from sludge, rice straw and spent coffee ground biochar on the mobility of arsenic in soil. *Sci. Total Environ.* **2018**, *635*, 1241-1248.
- [2] Ren, N.N.; Tang, Y.Y.; Li, M. Mineral additive enhanced carbon retention and stabilization in sewage sludge-derived biochar. *Process Saf Environ Prot* **2018**, *115*, 70-78.
- [3] Alves, B.S.Q.; Zelaya, K.P.S.; Colen, F.; Frazão, L.A.; Napoli, A.; Parikh, S.J.; Fernandes, L.A. Effect of sewage sludge and sugarcane bagasse biochar on soil properties and sugar beet production. *Pedosphere* **2021**, *31*, 572-582.
- [4] Chagas, J.K.M.; de Figueiredo, C.C.; da Silva, J.; Paz-Ferreiro, J. The residual effect of sewage sludge biochar on soil availability and bioaccumulation of heavy metals: Evidence from a three-year field experiment. *J. Environ.Manage.* **2021**, *279*, 111824.

- [5] Tsadik, Y.K.G.; Hailu, A.M.; Asfaw, S.L.; Mekonnen, Y.S. The effect of brewery sludge biochar on immobilization of bio-available cadmium and growth of *Brassica carinata*. *Heliyon* **2020**, *6*, e05573.
- [6] Gonzaga, M.I.S.; Mackowiak, C.; de Almeida, A.Q.; Wisniewski, A.; de Souza, D.F.; da Silva Lima, I.; de Jesus, A.N. Assessing biochar applications and repeated *Brassica juncea* L. production cycles to remediate Cu contaminated soil. *Chemosphere* **2018**, *201*, 278-285.
- [7] Tian, Y.F.; Cui, L.; Lin, Q.M.; Li, G.T.; Zhao, X.R. The sewage sludge biochar at low pyrolysis temperature had better improvement in urban soil and turf grass. *Agronomy* **2019**, *9*, 156.
- [8] Hossain, M.K.; Strezov, V.; Nelson, P.F. Comparative assessment of the effect of wastewater sludge biochar on growth, yield and metal bioaccumulation of cherry tomato. *Pedosphere* **2015**, *5*, 680-685.
- [9] Li, H.; Meng, J.; Liu, Z.Q.; Lan, Y.; Yang, X.; Huang, Y.W.; He, T.Y.; Chen, W.F. Effects of biochar on N<sub>2</sub>O emission in denitrification pathway from paddy soil: A drying incubation study. *Sci. Total Environ.* **2021**, *787*, 147591. [13] Ghodszad, L.; Reyhanitabar, A.; Oustan, S.; Alidokht, L. Phosphorus sorption and desorption characteristics of soils as affected by biochar. *Soil Tillage Res* **2022**, *216*, 105251.
- [10] Yang, C.Y.; Liu, J.J.; Lu, S.G. Pyrolysis temperature affects pore characteristics of rice straw and canola stalk biochars and biochar-amended soils. *Geoderma* **2021**, *397*, 115097.

- [11] Zhang, X.Y.; Gu, P.X.; Liu, X.Y.; Huang, X.; Wang, J.Y.; Zhang, S.Y.; Ji, J.H. Effect of crop straw biochars on the remediation of Cd-contaminated farmland soil by hyperaccumulator *Bidens pilosa* L. *Ecotoxicol. Environ. Saf.* **2021**, *219*, 112332.
- [12] Palansooriya, K.N.; Sang, M.K.; Igalavithana, A.D.; Zhang, M.; Hou, D.Y.; Oleszczuk, P.; Sung, J.; Ok, Y.S. Biochar alters chemical and microbial properties of microplastic-contaminated soil. *Environ. Res.* **2022**, *209*, 112807.
- [13] Ghodszad, L.; Reyhanitabar, A.; Oustan, S.; Alidokht, L. Phosphorus sorption and desorption characteristics of soils as affected by biochar. *Soil Tillage Res* **2022**, *216*, 105251.
- [14] Qin, J.L.; Qian, S.Y.; Chen, Q.C.; Chen, L.; Yan, L.L.; Shen, G.Q. Cow manure-derived biochar: Its catalytic properties and influential factors. *J. Hazard. Mater.* **2019**, *371*, 381-388.
- [15] Xu, Y.G.; Bai, T.X.; Yan, Y.B.; Ma, K.R. Influence of sodium hydroxide addition on characteristics and environmental risk of heavy metals in biochars derived from swine manure. *Waste Manage.* **2020**, *105*, 511-519.
- [16] Xu, Y.G.; Qu, W.; Sun, B.Y.; Peng, K.; Zhang, X.Z.; Xu, J.M.; Gao, F.; Yan, Y.B.; Bai, T.X. Effects of added calcium-based additives on swine manure derived biochar characteristics and heavy metals immobilization. *Waste Manage.* **2021**, *123*, 69-79.
- [17] Hossain, M.Z.; Bahar, M.M.; Sarkar, B.; Donne, S.W.; Wade, P.; Bolan, N. Assessment of the fertilizer potential of biochars produced from



slow pyrolysis of biosolid and animal manures. *J Anal Appl Pyrolysis* **2021**, *155*, 105043.[20] Buss, W.; Masek, O.; Graham, M.; Wüstc, D.

Inherent organic compounds in biochar-Their content, composition and potential toxic effects. *J. Environ. Manage.* **2015**, *156*, 150-157.

[18] Kiran, Y. K.; Barkat, A.; Cui, X.; Feng, Y.; Pan, F.; Tang, L.; Yang, X.E. Cow manure and cow manure-derived biochar application as a soil amendment for reducing cadmium availability and accumulation by *Brassica chinensis* L. in acidic red soil. *J Integr Agric* **2017**, *16*, 725-734.

[19] Wang, F.; Jin, L.T.; Guo, C.N.; Min, L.J.; Zhang, P.; Sun, H.W.; Zhu, H.K.; Zhang, C.P. Enhanced heavy metals sorption by modified biochars derived from pig manure. *Sci. Total Environ.* **2021**, *786*, 147595.
